# Supplementary material for: Cytotoxicity profiling of deep eutectic solvents to human skin cells
Source: PubMed Central journal article supplement (PMC6408470; doi:10.1038/s41598-019-39910-y), 2019-03-08
Supplement: 41598_2019_39910_MOESM1_ESM.pdf [file 41598_2019_39910_MOESM1_ESM.pdf]

## Supplementary Information

# **Cytotoxicity profiling of deep eutectic solvents to human skin cells**

Macário<sup>1</sup>, I.P.E., Oliveira<sup>1,2</sup>, H.\*, Menezes<sup>1</sup>, A.C., Ventura<sup>2</sup>, S.P.M., Pereira<sup>1</sup>, J.L., Gonçalves<sup>1,3</sup>,  
A.M.M., Coutinho<sup>2</sup>, J.A.P, Gonçalves<sup>1</sup>, F.J.M.

1 - Department of Biology & CESAM, University of Aveiro, 3810-193 Aveiro, Portugal

2 - CICECO - Aveiro Institute of Materials & Department of Chemistry, University of Aveiro,  
3810-193 Aveiro, Portugal

3- MARE, Department of Life Sciences, Faculty of Science and Technology, University of  
Coimbra, 3004-517 Coimbra, Portugal

\* Corresponding author e-mail: holiveira@ua.pt

**Table S1.** ANOVA summary table for viability assays conducted for each HBA, HBD and DES. Test (*F*) statistics and degrees of freedom are shown. MS stands for the mean squares (= variance) of the error term in the ANOVA.

| Chemical compound                     | Cell line | Source of variation | Degrees of freedom | Adjusted MS | Test statistic (F) | <i>P</i> |
|---------------------------------------|-----------|---------------------|--------------------|-------------|--------------------|----------|
| 1-propanol                            | HaCaT     | Treatment           | 6                  | 242.814     | 2.399              | < 0.05   |
|                                       |           | Error               | 56                 | 101.234     |                    |          |
|                                       | MNT-1     | Treatment           | 6                  | 606.469     | 7.800              | < 0.001  |
|                                       |           | Error               | 56                 | 77.752      |                    |          |
| [Chol]Cl                              | HaCaT     | Treatment           | 6                  | 473.349     | 2.754              | < 0.05   |
|                                       |           | Error               | 56                 | 171.892     |                    |          |
| [N <sub>1111</sub> ]Cl                | HaCaT     | Treatment           | 6                  | 957.494     | 11.330             | < 0.001  |
|                                       |           | Error               | 56                 | 84.506      |                    |          |
|                                       | MNT-1     | Treatment           | 6                  | 167.694     | 4.484              | < 0.001  |
|                                       |           | Error               | 56                 | 37.399      |                    |          |
| [N <sub>4444</sub> ]Cl                | MNT-1     | Treatment           | 6                  | 4165.981    | 87.661             | < 0.001  |
|                                       |           | Error               | 56                 | 47.524      |                    |          |
| Hexanoic acid                         | HaCaT     | Treatment           | 6                  | 836.197     | 6.570              | < 0.001  |
|                                       |           | Error               | 56                 | 127.267     |                    |          |
|                                       | MNT-1     | Treatment           | 6                  | 1172.941    | 54.774             | < 0.001  |
|                                       |           | Error               | 56                 | 21.414      |                    |          |
| Butanoic acid                         | MNT-1     | Treatment           | 6                  | 11659.994   | 508.086            | < 0.001  |
|                                       |           | Error               | 56                 | 22.949      |                    |          |
| Urea                                  | HaCaT     | Treatment           | 6                  | 303.124     | 4.158              | < 0.05   |
|                                       |           | Error               | 56                 | 72.897      |                    |          |
|                                       | MNT-1     | Treatment           | 6                  | 383.174     | 4.904              | < 0.001  |
|                                       |           | Error               | 56                 | 78.138      |                    |          |
| [Chol]Cl: Hexanoic acid               | MNT-1     | Treatment           | 6                  | 118.368     | 1.330              | 0.259    |
|                                       |           | Error               | 56                 | 88.991      |                    |          |
| [Chol]Cl: Butanoic acid               | HaCaT     | Treatment           | 6                  | 3734.246    | 56.332             | < 0.001  |
|                                       |           | Error               | 56                 | 66.290      |                    |          |
|                                       | MNT-1     | Treatment           | 6                  | 537.069     | 9.339              | < 0.001  |
|                                       |           | Error               | 56                 | 57.510      |                    |          |
| [Chol]Cl: Urea                        | HaCaT     | Treatment           | 6                  | 739.986     | 7.583              | < 0.001  |
|                                       |           | Error               | 56                 | 97.579      |                    |          |
| [Chol]Cl: 1-propanol                  | HaCaT     | Treatment           | 6                  | 1060.256    | 4.818              | < 0.001  |
|                                       |           | Error               | 56                 | 220.060     |                    |          |
|                                       | MNT-1     | Treatment           | 6                  | 295.371     | 8.254              | < 0.001  |
|                                       |           | Error               | 56                 | 35.787      |                    |          |
| [Chol]Cl: Ethylene glycol             | HaCaT     | Treatment           | 6                  | 757.471     | 10.479             | < 0.001  |
|                                       |           | Error               | 56                 | 72.282      |                    |          |
| [N <sub>1111</sub> ]Cl: Hexanoic acid | HaCaT     | Treatment           | 6                  | 2174.395    |                    | < 0.001  |
|                                       |           | Error               | 56                 | 206.575     |                    |          |
|                                       | MNT-1     | Treatment           | 6                  | 448.110     | 17.329             | < 0.001  |
|                                       |           | Error               | 56                 | 25.860      |                    |          |

|                                            |       |           |    |           |         |         |
|--------------------------------------------|-------|-----------|----|-----------|---------|---------|
| [N <sub>1111</sub> ]Cl:<br>Butanoic acid   | HaCaT | Treatment | 6  | 3109.968  | 99.597  | < 0.001 |
|                                            |       | Error     | 56 | 31.226    |         |         |
|                                            | MNT-1 | Treatment | 6  | 513.288   | 5.971   | < 0.001 |
|                                            |       | Error     | 56 | 85.966    |         |         |
| [N <sub>1111</sub> ]Cl: Urea               | HaCaT | Treatment | 6  | 847.578   | 6.185   | < 0.001 |
|                                            |       | Error     | 56 | 137.030   |         |         |
|                                            | MNT-1 | Treatment | 6  | 518.435   | 2.445   | < 0.05  |
|                                            |       | Error     | 56 | 212.003   |         |         |
| [N <sub>1111</sub> ]Cl:<br>Ethylene glycol | HaCaT | Treatment | 6  | 412.118   | 5.986   | < 0.001 |
|                                            |       | Error     | 56 | 68.846    |         |         |
| [N <sub>4444</sub> ]Cl:<br>Hexanoic acid   | MNT-1 | Treatment | 6  | 3817.235  | 84.844  | < 0.001 |
|                                            |       | Error     | 56 | 44.991    |         |         |
| [N <sub>4444</sub> ]Cl:<br>Butanoic acid   | MNT-1 | Treatment | 6  | 3364.697  | 199.669 | < 0.001 |
|                                            |       | Error     | 56 | 16.851    |         |         |
| N <sub>4444</sub> ]Cl:<br>1-propanol       | MNT-1 | Treatment | 6  | 7321.778  | 463.362 | < 0.001 |
|                                            |       | Error     | 56 | 15.801    |         |         |
| N <sub>4444</sub> ]Cl: Urea                | HaCaT | Treatment | 5  | 10521.082 | 585.114 | < 0.001 |
|                                            |       | Error     | 48 | 17.981    |         |         |

**Table S2.** One-way ANOVA on ranks summary table for viability assays conducted for each HBA, HBD and DES. Test (*H*) statistics and degrees of freedom are shown.

| Chemical compound                       | Cell line | Degrees of freedom | Test statistics (H) | <i>P</i> |
|-----------------------------------------|-----------|--------------------|---------------------|----------|
| Ethylene glycol                         | HaCaT     | 6                  | 36.060              | < 0.001  |
|                                         | MNT-1     | 6                  | 32.135              | < 0.001  |
| [Chol]Cl                                | MNT-1     | 6                  | 17.750              | < 0.05   |
| [N <sub>4444</sub> ]Cl                  | HaCaT     | 6                  | 57.909              | < 0.001  |
| Butanoic acid                           | HaCaT     | 6                  | 56.876              | < 0.001  |
| [Chol]Cl: Hexanoic acid                 | HaCaT     | 6                  | 21.917              | < 0.05   |
| [Chol]Cl: Urea                          | MNT-1     | 6                  | 12.567              | 0.05     |
| [Chol]Cl: Ethylene glycol               | MNT-1     | 6                  | 31.128              | < 0.001  |
| [N <sub>1111</sub> ]Cl: 1-propanol      | HaCaT     | 6                  | 22.018              | < 0.05   |
|                                         | MNT-1     | 6                  | 25.649              | < 0.001  |
|                                         | MNT-1     | 6                  | 36.875              | < 0.001  |
| [N <sub>1111</sub> ]Cl: Ethylene glycol |           |                    |                     |          |
| [N <sub>4444</sub> ]Cl: Hexanoic acid   | HaCaT     | 6                  | 57.981              | < 0.001  |
| [N <sub>4444</sub> ]Cl: Butanoic acid   | HaCaT     | 6                  | 60.187              | < 0.001  |
| [N <sub>4444</sub> ]Cl: 1-propanol      | HaCaT     | 6                  | 52.086              | < 0.001  |
| [N <sub>4444</sub> ]Cl: Ethylene glycol | HaCaT     | 6                  | 48.516              | < 0.001  |
| [N <sub>4444</sub> ]Cl: Urea            | MNT-1     | 6                  | 50.356              | < 0.001  |

HBA

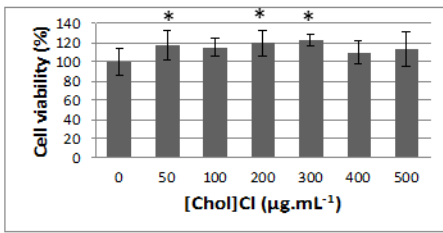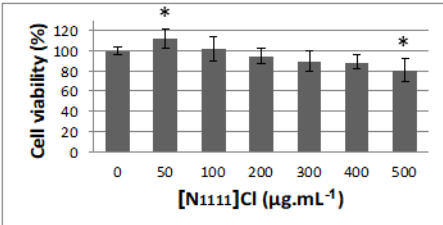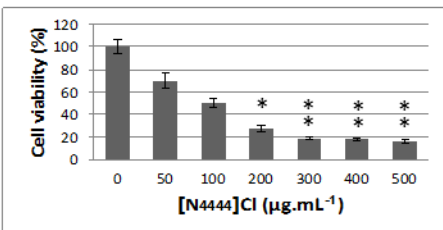

HBD

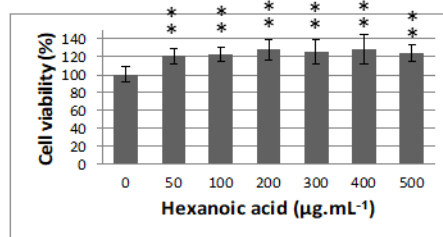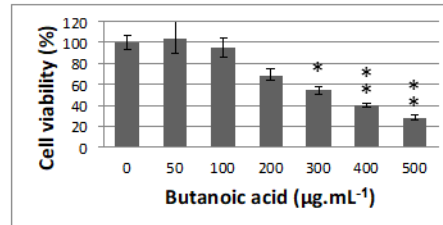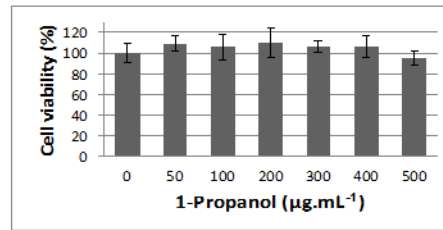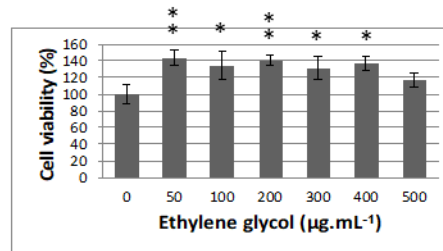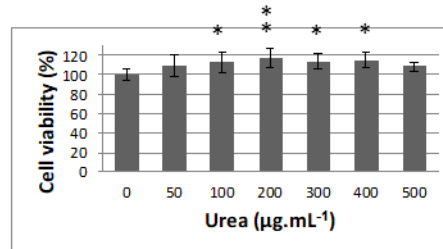

**Figure S1:** Cell viability of HaCaT cell line after 72h of exposure to starting materials. Results are expressed as mean  $\pm$  SD of three independent experiments. Statistical analysis: \* $p < 0.05$  vs control; \*\* $p < 0.001$  vs control

HBA:HBD 1:1

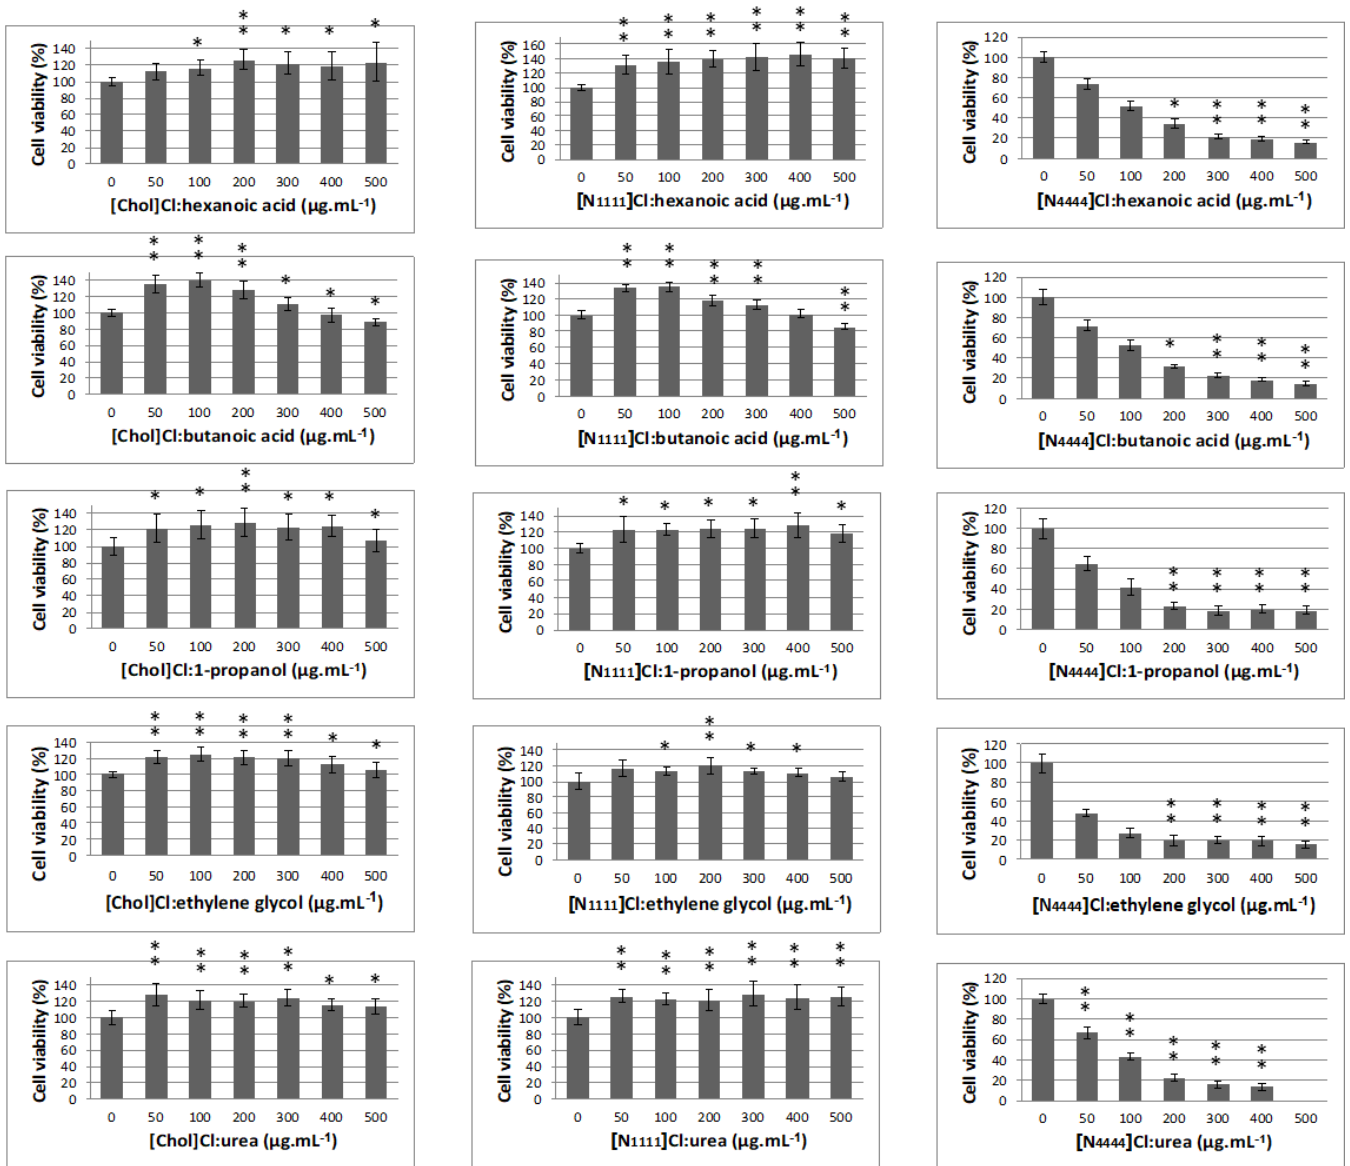

**Figure S2:** Cell viability of HaCaT cell line after 72h of exposure to DES. Results are expressed as mean  $\pm$  SD of three independent experiments. Statistical analysis: \*p < 0.05 vs control; \*\*p < 0.001 vs control

HBA

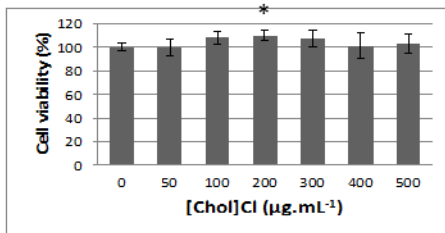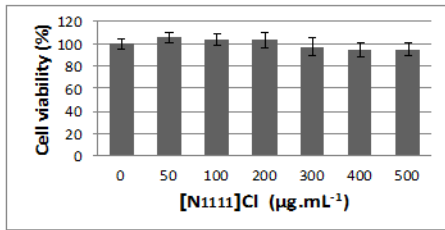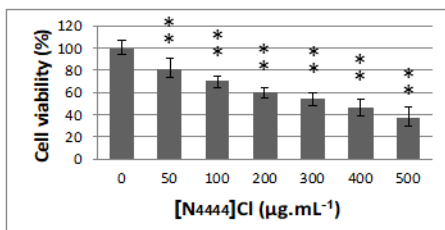

HBD

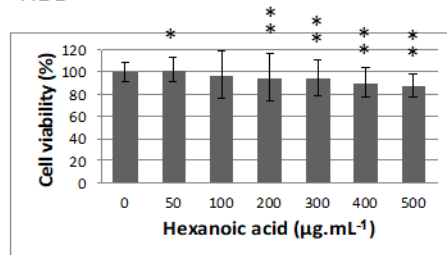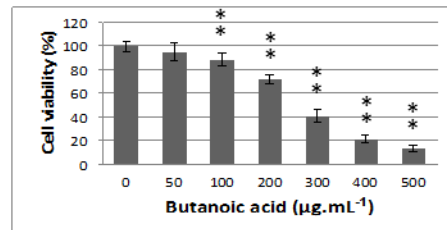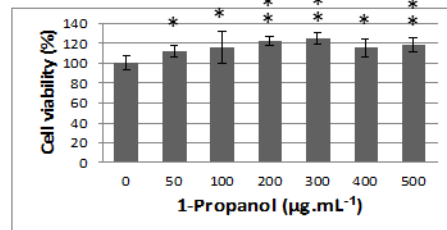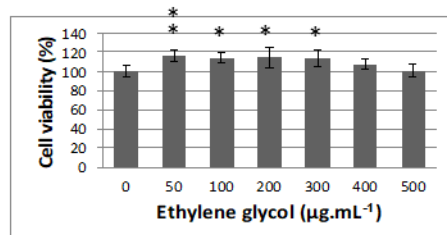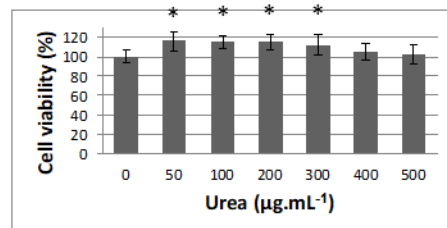

**Figure S3:** Cell viability of MNT-1 cell line after 72h of exposure to starting materials. Results are expressed as mean  $\pm$  SD of three independent experiments. Statistical analysis: \* $p < 0.05$  vs control; \*\* $p < 0.001$  vs control

HBA:HBD 1:1

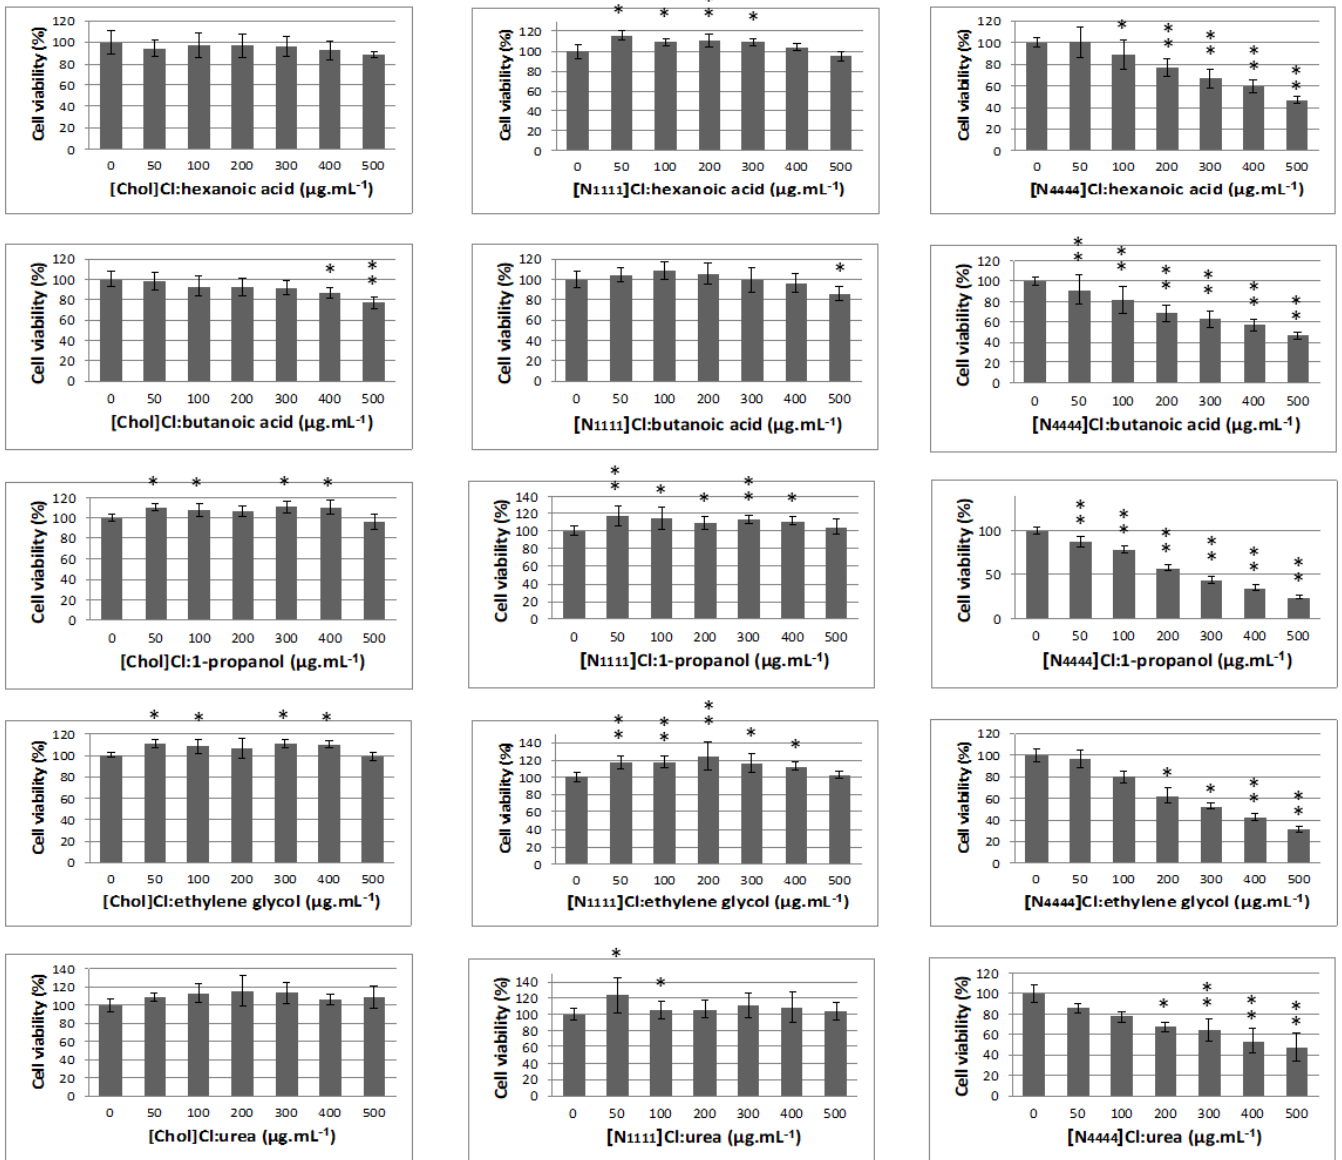

**Figure S4:** Cell viability of MNT-1 cell line after 72h of exposure to DES. Results are expressed as mean  $\pm$  SD of three independent experiments. Statistical analysis: \*p < 0.05 vs control; \*\*p < 0.001 vs control
